# Supplementary material for: Morphology control and tunable color of LuVO4:Ln3+ (Ln = Tm, Er, Sm, Eu) nano/micro-structures
Source: Royal Society of Chemistry journal article supplement (doi:10.1039/c6nj03042d), 2016-12-07
Supplement: c6nj03042d1.pdf [file c6nj03042d1.pdf]

## Morphology control and tunable color of LuVO<sub>4</sub>:Ln<sup>3+</sup> (Ln = Tm, Er, Sm, Eu) nano/micro-structures

Yuexin Wang<sup>a</sup> Yanhua Song<sup>a\*</sup> Yi Li<sup>a</sup> Tingting Cui<sup>a</sup> Xiuqing Zhou<sup>a</sup> Ye Sheng<sup>a</sup> Keyan Zheng<sup>a</sup> Hongpeng You<sup>b</sup> and Haifeng Zou<sup>a\*</sup>

<sup>a</sup> College of Chemistry, Jilin University, Changchun 130012, P. R. China.

<sup>b</sup> State Key Laboratory of Rare Earth Resource Utilization, Changchun Institute of Applied Chemistry, Chinese Academy of Sciences, Changchun 130022, P. R. China.

E-mail: yhsong@jlu.edu.cn (Y. S.); zouhf@jlu.edu.cn (H. Z.)

### New Journal of Chemistry

Table S1. Data fit results for the UV-vis absorbance spectra of the different morphologies (<sup>1</sup>A<sub>1</sub>-<sup>1</sup>T<sub>1</sub> (with intensity *I*<sub>1</sub>); <sup>1</sup>A<sub>1</sub>-<sup>1</sup>T<sub>2</sub> (with intensity *I*<sub>2</sub>); V<sup>4+</sup> (with intensity *I*<sub>3</sub>)).

| Sample          | <sup>1</sup> A <sub>1</sub> - <sup>1</sup> T <sub>1</sub><br>(nm) | <i>I</i> <sub>1</sub> | <sup>1</sup> A <sub>1</sub> - <sup>1</sup> T <sub>2</sub><br>(nm) | <i>I</i> <sub>2</sub> | V <sup>4+</sup><br>(nm) | <i>I</i> <sub>3</sub> | <i>I</i> <sub>3</sub> /( <i>I</i> <sub>1</sub> + <i>I</i> <sub>2</sub> + <i>I</i> <sub>3</sub> ) |
|-----------------|-------------------------------------------------------------------|-----------------------|-------------------------------------------------------------------|-----------------------|-------------------------|-----------------------|--------------------------------------------------------------------------------------------------|
| Nanoparticles   | 282.9                                                             | 0.187                 | 206.8                                                             | 3.910                 | ---                     | 0                     | 0                                                                                                |
| Sub-microflakes | 323.4                                                             | 0.091                 | 210.8                                                             | 0.809                 | 384.6                   | 0.013                 | 0.014                                                                                            |
| microspheres    | 331.9                                                             | 0.255                 | 211.3                                                             | 0.511                 | 381.6                   | 0.099                 | 0.114                                                                                            |

Table S2. The lattice parameters and the *I*<sub>3</sub>/(*I*<sub>1</sub>+*I*<sub>2</sub>+*I*<sub>3</sub>) of different morphologies.

| Sample          | <i>a</i> | <i>c</i> | <i>c/a</i> | <i>V</i> | <i>I</i> <sub>3</sub> /( <i>I</i> <sub>1</sub> + <i>I</i> <sub>2</sub> + <i>I</i> <sub>3</sub> ) |
|-----------------|----------|----------|------------|----------|--------------------------------------------------------------------------------------------------|
| Nanoparticles   | 7.051    | 6.25     | 0.886      | 310.96   | 0                                                                                                |
| Sub-microflakes | 7.027    | 6.23     | 0.887      | 307.75   | 0.014                                                                                            |
| Microspheres    | 6.998    | 6.25     | 0.893      | 305.88   | 0.114                                                                                            |

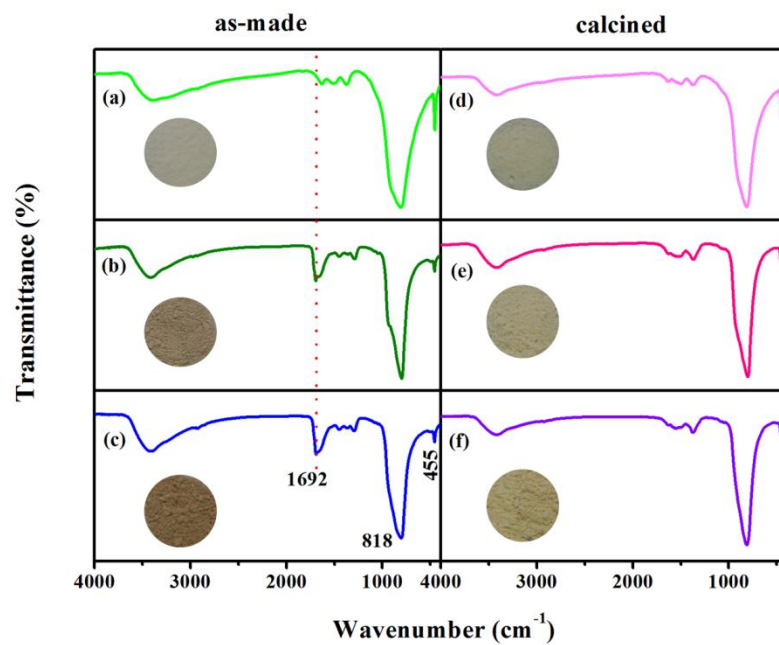

Figure S1. The FT-IR spectra of  $\text{LuVO}_4$  products (as-made samples and calcined samples): (a) (d) nanoparticles, (b) (e) sub-microflakes, (c) (f) microspheres; Insets are the photographs of the corresponding sample color.

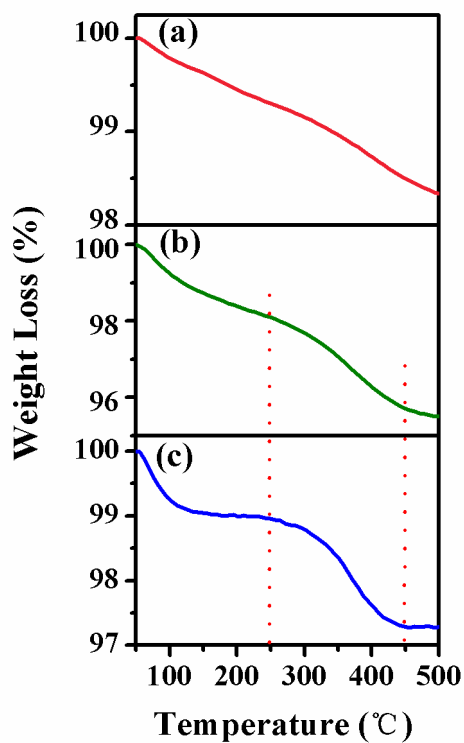

Figure S2. The DGA curves of  $\text{LuVO}_4$  products: (a) nanoparticles, (b) sub-microflakes, (c) microspheres.

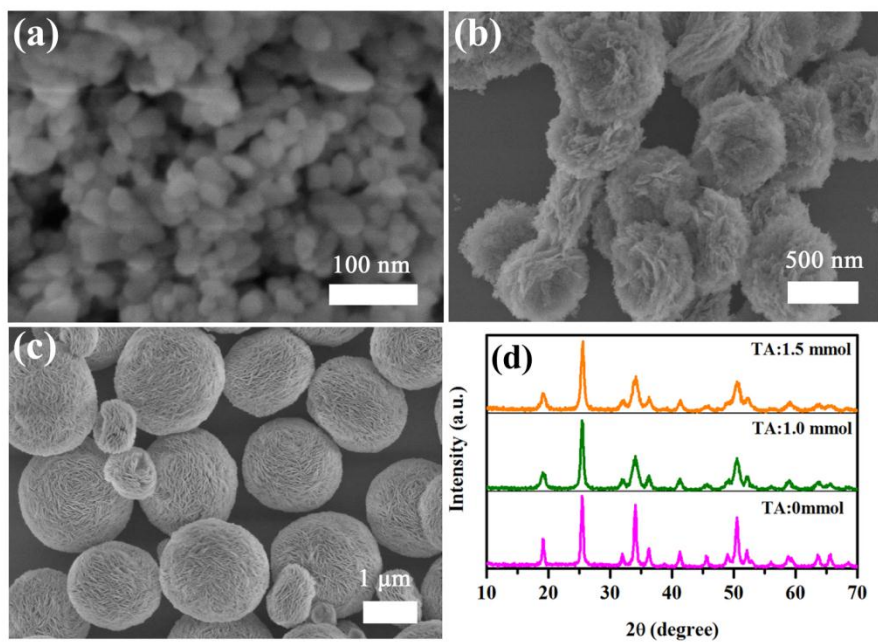

Figure S3. The SEM images of calcined  $\text{LuVO}_4:\text{Eu}^{3+}$  products with different molar of TA: (a) 0 mmol, (b) 1.0 mmol, (c) 1.5 mmol; and the corresponding XRD patterns (d).

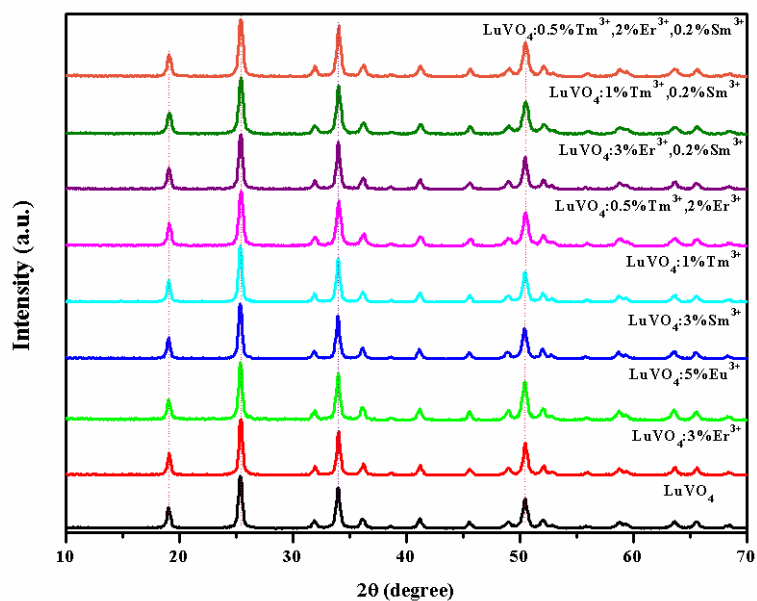

Fig. S4. The XRD patterns of  $\text{LuVO}_4:\text{Ln}^{3+}$  samples.
